# Supplementary material for: Bmtret1 Gene Family and Its Potential Role in Response to BmNPV Stress in Bombyx mori
Source: Preprints.org preprint supplement (doi:10.20944/preprints202311.0360.v1), 2023-11-06
Supplement: Supplementary file 1 [file supplementary]

**Table S1.** Primer sequence.

| **Primer name** | **Sequence(5' to 3')** |
| --- | --- |
| BMSK0015674-F | ACAATAGCATTCGCATTCG |
| BMSK0015674-R | AGTCTCCAGAGTCAGTGAA |
| BMSK0015638-F | ACCTTACGATGCGATGTG |
| BMSK0015638-R | CTCTTCCAACTCCTGTCTG |
| BMSK0008304-F | GCAAGGAACAGCAGATGA |
| BMSK0008304-R | CTATGATGGAAGCCGTGAA |
| BMSK0012519-F | GTTCGCCTTCTGCTCTAA |
| BMSK0012519-R | GGTCTCCGTCCATATCTTC |
| BMSK0015627-F | CGGATTCACTGGACTGTTA |
| BMSK0015627-R | TGGTAAGATTGTTGGCGATA |
| BMSK0009966-F | CTGTGAAGGAATTGCTAACC |
| BMSK0009966-R | AATAGTGACCGAACGAATCT |
| BMSK0015729-F | TTGTTGCCTTCGTTATGTTG |
| BMSK0015729-R | CACTGTTCACTTCGCTACT |
| BMSK0011446-F | GCACGCATTGTCCTTATC |
| BMSK0011446-R | GCACGCATTGTCCTTATC |
| BMSK0011410-F | AGCCAAGACAACATCAGAG |
| BMSK0011410-R | TCAGCATCAACAACACAGT |
| BMSK0015118-F | GCAGTATGTCGGAGTAGC |
| BMSK0015118-R | GAGATGTAGAACGCCTTGA |
| BMSK0015120-F | AATGGCAACGCAGTAGTC |
| BMSK0015120-R | ACAGAAGGCAGTGGCTAT |
| BMSK0007748-F | CGTCCTTATACCACAACTGA |
| BMSK0007748-R | AACACCAACTGCGATTCC |
| BMSK0011573-F | ACAAGAGACCTGCGGATA |
| BMSK0011573-R | GACACTGGAGAAGATGATGA |
| BMSK0015774-F | GTCCACCGTAACCAGAGA |
| BMSK0015774-R | GATGCGTATAACCAGAATGC |
| BMSK0015122-F | GGACTATGCGTAGGATTGAT |
| BMSK0015122-R | TGATATGAATGTGCCGAGAA |
| BMSK0011404-F | GCTTCTGTTCGTCTCCTC |
| BMSK0011404-R | AGTCCTCGCTGATCTCTT |
| BMSK0003818-F | CATCTATCGCACGCTACA |
| BMSK0003818-R | CGCTGAAGACGCTATTATC |
| BMSK0002683-F | TAGGAAGGCGTAGAACTATAC |
| BMSK0002683-R | CACCAACACATAATCCACAA |
| BMSK0002685-F | TGCCTCGTTATCTATGTGTT |
| BMSK0002685-R | TCCAGTTGAAGCCAGTTG |
| BMSK0015633-F | TATGGCGATGCTCCTAATAG |
| BMSK0015633-R | TCTCCTGTAGACTCCTTCC |
| BMSK0015673-F | GCTGGTTCCTGTTTCTAC |
| BMSK0015673-R | TTGGGTCCGTCATTTCTC |
